# Supplementary material for: Multi-Approach Assessment for Stress Evaluation in Rainbow Trout Females, Oncorhynchus mykiss (Walbaum, 1792) from Three Different Farms during the Summer Season
Source: MDPI journal article supplement (doi:10.3390/ani11061810), 2021-06-17
Supplement: s1 [file s1]

Supplementary Table S1. Correlation matrices showing Spearman rank correlation coefficient between parameters recorded during May 2019 in three rainbow trout farms from Romania. Significant correlations were marked with a box in the table. Significance codes are the following: P<0.0001 ‘\*\*\*’ P<0.001 ‘\*\*’ P<0.01 ‘\*’ P<0.05 ‘.’ (Abbreviations: Hb – hemoglobin, Hct – hematocrit, RBC – red blood cell count, MCV – mean corpuscular volume, MCH – mean corpuscular hemoglobin, MCHC - mean corpuscular hemoglobin concentration, T – testosterone, E<sub>2</sub>– estradiol, PROG – progesterone, F – cortisol, SOD – superoxide dismutase, GPx - glutathione peroxidase, Temp – temperature, Cond – Conductivity, TDS – total dissolved solids, DO – dissolved oxygen, NO<sub>2</sub> – nitrites, NO<sub>3</sub> – nitrates, NH<sub>3</sub> – ammonia, bdy – body temperature)

| May 2019       | Hb    | Hct      | RBC      | MCV   | MCH      | MCHC | T        | E <sub>2</sub> | PROG  | F        | SOD   | GPx    | pH    | Temp  | Resist | Cond  | TDS   | Salinity | DO    | NO <sub>2</sub> | NO <sub>3</sub> | NH <sub>3</sub> | bdy   |
|----------------|-------|----------|----------|-------|----------|------|----------|----------------|-------|----------|-------|--------|-------|-------|--------|-------|-------|----------|-------|-----------------|-----------------|-----------------|-------|
| Hb             | 1     | 0.55***  | 0.4.     | 0.13  | 0.56***  | 0.5  | 0.11     | -0.15          | -0.06 | 0.01     | 0.18  | 0.08   | -0.52 | -0.36 | 0.36   | -0.36 | -0.36 | -0.52    | 0.36  | -0.36           | 0.39            | -0.52           | 0.05  |
| Hct            | 0.55  | 1        | 0.45***  | 0.35  | 0.17     | -0.3 | 0.29     | -0.18          | -0.34 | 0.04     | 0.1   | 0.03   | -0.58 | -0.48 | 0.48   | -0.48 | -0.48 | -0.58    | 0.48  | -0.48           | 0.39            | -0.58           | -0.02 |
| RBC            | 0.4   | 0.45***  | 1        | -0.58 | -0.46*** | 0.1  | 0.44*    | -0.02          | 0.02  | 0.36.    | 0.45  | 0.05   | -0.34 | -0.67 | 0.67   | -0.67 | -0.67 | -0.34    | 0.67  | -0.67           | 0.01            | -0.34           | 0.38  |
| MCV            | 0.13  | 0.35.    | -0.58*** | 1     | 0.68***  | -0.3 | -0.24    | -0.13          | -0.33 | -0.35.   | -0.4  | 0.04   | -0.17 | 0.26  | -0.26  | 0.26  | 0.26  | -0.17    | -0.26 | 0.26            | 0.35            | -0.17           | -0.44 |
| MCH            | 0.56  | 0.17     | -0.46*** | 0.68  | 1        | 0.4  | -0.29    | -0.13          | -0.09 | -0.32.   | -0.26 | 0.02   | -0.2  | 0.25  | -0.25  | 0.25  | 0.25  | -0.2     | -0.25 | 0.25            | 0.37            | -0.2            | -0.35 |
| MCHC           | 0.53  | -0.32.   | 0.08     | -0.3  | 0.41.    | 1    | -0.13    | 0.11           | 0.33  | 0.04     | 0.11  | 0.01   | -0.01 | -0.02 | 0.02   | -0.02 | -0.02 | -0.01    | 0.02  | -0.02           | 0               | -0.01           | 0.14  |
| T              | 0.11  | 0.29     | 0.44***  | -0.24 | -0.29    | -0.1 | 1        | -0.1           | -0.09 | 0.55     | 0.24  | -0.1   | -0.11 | -0.74 | 0.74   | -0.74 | -0.74 | -0.11    | 0.74  | -0.74           | -0.3            | -0.11           | 0.6   |
| E <sub>2</sub> | -0.15 | -0.18    | -0.02    | -0.13 | -0.13    | 0.1  | -0.1     | 1              | 0.32  | 0.36.    | -0.07 | -0.15  | 0.44  | 0.07  | -0.07  | 0.07  | 0.07  | 0.44     | -0.07 | 0.07            | -0.46           | 0.44            | 0.14  |
| PROG           | -0.06 | -0.34.   | 0.02     | -0.33 | -0.09    | 0.3  | -0.09    | 0.32.          | 1     | 0.18     | 0.07  | -0.19  | 0.21  | 0.17  | -0.17  | 0.17  | 0.17  | 0.21     | -0.17 | 0.17            | -0.14           | 0.21            | 0.09  |
| F              | 0.01  | 0.04     | 0.36.    | -0.35 | -0.32.   | 0    | 0.55***  | 0.36.          | 0.18  | 1        | 0.1   | -0.18  | 0.06  | -0.54 | 0.54   | -0.54 | -0.54 | 0.06     | 0.54  | -0.54           | -0.38           | 0.06            | 0.52  |
| SOD            | 0.18  | 0.1      | 0.45***  | -0.4  | -0.26    | 0.1  | 0.24     | -0.07          | 0.07  | 0.1      | 1     | 0.34.  | -0.38 | -0.31 | 0.31   | -0.31 | -0.31 | -0.38    | 0.31  | -0.31           | 0.26            | -0.38           | 0.04  |
| GPx            | 0.08  | 0.03     | 0.05     | 0.04  | 0.02     | 0    | -0.1     | -0.15          | -0.19 | -0.18    | 0.34  | 1      | -0.37 | -0.05 | 0.05   | -0.05 | -0.05 | -0.37    | 0.05  | -0.05           | 0.4             | -0.37           | -0.24 |
| pH             | -0.52 | -0.58*** | -0.34.   | -0.17 | -0.2     | -0   | -0.11    | 0.44***        | 0.21  | 0.06     | -0.38 | -0.37. | 1     | 0.5   | -0.5   | 0.5   | 0.5   | 1        | -0.5  | 0.5             | -0.87           | 1               | 0.26  |
| Temp           | -0.36 | -0.48*** | -0.67*** | 0.26  | 0.25     | -0   | -0.74*** | 0.07           | 0.17  | -0.54*** | -0.31 | -0.05  | 0.5   | 1     | -1     | 1     | 1     | 0.5      | -1    | 1               | 0               | 0.5             | -0.58 |
| Resist         | 0.36  | 0.48***  | 0.67***  | -0.26 | -0.25    | 0    | 0.74***  | -0.07          | -0.17 | 0.54***  | 0.31  | 0.05   | -0.5  | -1    | 1      | -1    | -1    | -0.5     | 1     | -1              | 0               | -0.5            | 0.58  |
| Cond           | -0.36 | -0.48*** | -0.67*** | 0.26  | 0.25     | -0   | -0.74*** | 0.07           | 0.17  | -0.54*** | -0.31 | -0.05  | 0.5   | 1     | -1     | 1     | 1     | 0.5      | -1    | 1               | 0               | 0.5             | -0.58 |
| TDS            | -0.36 | -0.48*** | -0.67*** | 0.26  | 0.25     | -0   | -0.74*** | 0.07           | 0.17  | -0.54*** | -0.31 | -0.05  | 0.5   | 1     | -1     | 1     | 1     | 0.5      | -1    | 1               | 0               | 0.5             | -0.58 |
| Salinity       | -0.52 | -0.58*** | -0.34.   | -0.17 | -0.2     | -0   | -0.11    | 0.44***        | 0.21  | 0.06     | -0.38 | -0.37. | 1     | 0.5   | -0.5   | 0.5   | 0.5   | 1        | -0.5  | 0.5             | -0.87           | 1               | 0.26  |
| DO             | 0.36  | 0.48***  | 0.67***  | -0.26 | -0.25    | 0    | 0.74***  | -0.07          | -0.17 | 0.54***  | 0.31  | 0.05   | -0.5  | -1    | 1      | -1    | -1    | -0.5     | 1     | -1              | 0               | -0.5            | 0.58  |
| NO2            | -0.36 | -0.48*** | -0.67*** | 0.26  | 0.25     | -0   | -0.74*** | 0.07           | 0.17  | -0.54*** | -0.31 | -0.05  | 0.5   | 1     | -1     | 1     | 1     | 0.5      | -1    | 1               | 0               | 0.5             | -0.58 |
| NO3            | 0.39  | 0.39.    | 0.01     | 0.35  | 0.37.    | 0    | -0.3.    | -0.46***       | -0.14 | -0.38.   | 0.26  | 0.4.   | -0.87 | 0     | 0      | 0     | 0     | -0.87    | 0     | 0               | 1               | -0.87           | -0.63 |
| NH3            | -0.52 | -0.58*** | -0.34.   | -0.17 | -0.2     | -0   | -0.11    | 0.44***        | 0.21  | 0.06     | -0.38 | -0.37. | 1     | 0.5   | -0.5   | 0.5   | 0.5   | 1        | -0.5  | 0.5             | -0.87           | 1               | 0.26  |
| bdy-temp       | 0.05  | -0.02    | 0.38.    | -0.44 | -0.35.   | 0.1  | 0.6***   | 0.14           | 0.09  | 0.52***  | 0.04  | -0.24  | 0.26  | -0.58 | 0.58   | -0.58 | -0.58 | 0.26     | 0.58  | -0.58           | -0.63           | 0.26            | 1     |

Supplementary Table S2. Correlation matrices showing Spearman rank correlation coefficient between parameters recorded during June 2019 in three rainbow trout farms from Romania. Significant correlations were marked with a box in the table. Significance codes are the following: P<0.0001 ‘\*\*\*’ P<0.001 ‘\*\*’ P<0.01 ‘\*’ P<0.05 ‘.’ (Abbreviations: Hb – hemoglobin, Hct – hematocrit, RBC – red blood cell count, MCV – mean corpuscular volume, MCH – mean corpuscular hemoglobin, MCHC - mean corpuscular hemoglobin concentration, T – testosterone, E<sub>2</sub> – estradiol, PROG – progesterone, F – cortisol, SOD – superoxide dismutase, GPx - glutathione peroxidase, Temp – temperature, Cond – Conductivity, TDS – total dissolved solids, DO – dissolved oxygen, NO<sub>2</sub> – nitrites, NO<sub>3</sub> – nitrates, NH<sub>3</sub> – ammonia, bdy – body temperature)

| June 2019       | Hb    | Hct     | RBC      | MCV   | MCH      | MCHC  | T      | E <sub>2</sub> | PROG  | F      | SOD   | GPx     | pH    | Temp  | Resist | Cond  | TDS   | Salinity | DO    | NO <sub>2</sub> | NO <sub>3</sub> | NH <sub>3</sub> | bdy   |
|-----------------|-------|---------|----------|-------|----------|-------|--------|----------------|-------|--------|-------|---------|-------|-------|--------|-------|-------|----------|-------|-----------------|-----------------|-----------------|-------|
| Hb              | 1     | 0.29    | -0.17    | 0.25  | 0.68***  | 0.77  | -0.31. | -0.34.         | 0.07  | -0.09  | -0.1  | -0.41*  | -0.55 | -0.55 | 0.76   | -0.76 | -0.76 | -0.76    | 0.55  | -0.2            | -0.55           | -0.2            | -0.52 |
| Hct             | 0.29  | 1       | -0.24    | 0.58  | 0.34.    | -0.29 | -0.11  | -0.16          | -0.07 | 0.19   | 0.22  | -0.28   | -0.11 | -0.11 | 0.31   | -0.31 | -0.31 | -0.31    | 0.11  | -0.21           | -0.11           | -0.21           | -0.07 |
| RBC             | -0.17 | -0.24   | 1        | -0.91 | -0.79*** | 0.01  | 0.05   | -0.08          | -0.11 | 0.27   | 0.09  | 0.25    | 0.35  | 0.35  | -0.2   | 0.2   | 0.2   | 0.2      | -0.35 | -0.15           | 0.35            | -0.15           | 0.3   |
| MCV             | 0.25  | 0.58*** | -0.91*** | 1     | 0.78***  | -0.13 | -0.11  | -0.02          | 0.06  | -0.15  | -0.04 | -0.32.  | -0.37 | -0.37 | 0.31   | -0.31 | -0.31 | -0.31    | 0.37  | 0.06            | -0.37           | 0.06            | -0.3  |
| MCH             | 0.68  | 0.34.   | -0.79*** | 0.78  | 1        | 0.46  | -0.23  | -0.13          | 0.02  | -0.24  | -0.1  | -0.43*  | -0.56 | -0.56 | 0.59   | -0.59 | -0.59 | -0.59    | 0.56  | -0.03           | -0.56           | -0.03           | -0.5  |
| MCHC            | 0.77  | -0.29   | 0.01     | -0.13 | 0.46*    | 1     | -0.22  | -0.23          | 0.02  | -0.19  | -0.14 | -0.19   | -0.38 | -0.38 | 0.51   | -0.51 | -0.51 | -0.51    | 0.38  | -0.13           | -0.38           | -0.13           | -0.38 |
| T               | -0.31 | -0.11   | 0.05     | -0.11 | -0.23    | -0.22 | 1      | 0.15           | 0.15  | 0.08   | 0.36  | 0.22    | 0.35  | 0.35  | -0.42  | 0.42  | 0.42  | 0.42     | -0.35 | 0.07            | 0.35            | 0.07            | 0.36  |
| E <sub>2</sub>  | -0.34 | -0.16   | -0.08    | -0.02 | -0.13    | -0.23 | 0.15   | 1              | 0.11  | -0.33. | 0.17  | 0.06    | 0.1   | 0.1   | -0.42  | 0.42  | 0.42  | 0.42     | -0.1  | 0.32            | 0.1             | 0.32            | 0.05  |
| PROG            | 0.07  | -0.07   | -0.11    | 0.06  | 0.02     | 0.02  | 0.15   | 0.11           | 1     | -0.09  | 0.07  | 0.12    | -0.22 | -0.22 | -0.07  | 0.07  | 0.07  | 0.07     | 0.22  | 0.29            | -0.22           | 0.29            | -0.2  |
| F               | -0.09 | 0.19    | 0.27     | -0.15 | -0.24    | -0.19 | 0.08   | -0.33.         | -0.09 | 1      | 0.08  | 0.04    | 0.21  | 0.21  | -0.1   | 0.1   | 0.1   | 0.1      | -0.21 | -0.11           | 0.21            | -0.11           | 0.23  |
| SOD             | -0.1  | 0.22    | 0.09     | -0.04 | -0.1     | -0.14 | 0.36.  | 0.17           | 0.07  | 0.08   | 1     | -0.06   | 0.51  | 0.51  | -0.2   | 0.2   | 0.2   | 0.2      | -0.51 | -0.31           | 0.51            | -0.31           | 0.48  |
| GPx             | -0.41 | -0.28   | 0.25     | -0.32 | -0.43*   | -0.19 | 0.22   | 0.06           | 0.12  | 0.04   | -0.06 | 1       | 0.22  | 0.22  | -0.6   | 0.6   | 0.6   | 0.6      | -0.22 | 0.38            | 0.22            | 0.38            | 0.13  |
| pH              | -0.55 | -0.11   | 0.35.    | -0.37 | -0.56*** | -0.38 | 0.35.  | 0.1            | -0.22 | 0.21   | 0.51  | 0.22    | 1     | 1     | -0.5   | 0.5   | 0.5   | 0.5      | -1    | -0.5            | 1               | -0.5            | 0.94  |
| Temp            | -0.55 | -0.11   | 0.35.    | -0.37 | -0.56*** | -0.38 | 0.35.  | 0.1            | -0.22 | 0.21   | 0.51  | 0.22    | 1     | 1     | -0.5   | 0.5   | 0.5   | 0.5      | -1    | -0.5            | 1               | -0.5            | 0.94  |
| Resist          | 0.76  | 0.31.   | -0.2     | 0.31  | 0.59***  | 0.51  | -0.42* | -0.42*         | -0.07 | -0.1   | -0.2  | -0.6*** | -0.5  | -0.5  | 1      | -1    | -1    | -1       | 0.5   | -0.5            | -0.5            | -0.5            | -0.47 |
| Cond            | -0.76 | -0.31.  | 0.2      | -0.31 | -0.59*** | -0.51 | 0.42*  | 0.42*          | 0.07  | 0.1    | 0.2   | 0.6***  | 0.5   | 0.5   | -1     | 1     | 1     | 1        | -0.5  | 0.5             | 0.5             | 0.5             | 0.47  |
| TDS             | -0.76 | -0.31.  | 0.2      | -0.31 | -0.59*** | -0.51 | 0.42*  | 0.42*          | 0.07  | 0.1    | 0.2   | 0.6***  | 0.5   | 0.5   | -1     | 1     | 1     | 1        | -0.5  | 0.5             | 0.5             | 0.5             | 0.47  |
| Salinity        | -0.76 | -0.31.  | 0.2      | -0.31 | -0.59*** | -0.51 | 0.42*  | 0.42*          | 0.07  | 0.1    | 0.2   | 0.6***  | 0.5   | 0.5   | -1     | 1     | 1     | 1        | -0.5  | 0.5             | 0.5             | 0.5             | 0.47  |
| DO              | 0.55  | 0.11    | -0.35.   | 0.37  | 0.56***  | 0.38  | -0.35. | -0.1           | 0.22  | -0.21  | -0.51 | -0.22   | -1    | -1    | 0.5    | -0.5  | -0.5  | -0.5     | 1     | 0.5             | -1              | 0.5             | -0.94 |
| NO <sub>2</sub> | -0.2  | -0.21   | -0.15    | 0.06  | -0.03    | -0.13 | 0.07   | 0.32.          | 0.29  | -0.11  | -0.31 | 0.38*   | -0.5  | -0.5  | -0.5   | 0.5   | 0.5   | 0.5      | 0.5   | 1               | -0.5            | 1               | -0.47 |
| NO <sub>3</sub> | -0.55 | -0.11   | 0.35.    | -0.37 | -0.56*** | -0.38 | 0.35.  | 0.1            | -0.22 | 0.21   | 0.51  | 0.22    | 1     | 1     | -0.5   | 0.5   | 0.5   | 0.5      | -1    | -0.5            | 1               | -0.5            | 0.94  |
| NH <sub>3</sub> | -0.2  | -0.21   | -0.15    | 0.06  | -0.03    | -0.13 | 0.07   | 0.32.          | 0.29  | -0.11  | -0.31 | 0.38*   | -0.5  | -0.5  | -0.5   | 0.5   | 0.5   | 0.5      | 0.5   | 1               | -0.5            | 1               | -0.47 |
| bdy-temp        | -0.52 | -0.07   | 0.3.     | -0.3  | -0.5**   | -0.38 | 0.36.  | 0.05           | -0.2  | 0.23   | 0.48  | 0.13    | 0.94  | 0.94  | -0.47  | 0.47  | 0.47  | 0.47     | -0.94 | -0.47           | 0.94            | -0.47           | 1     |

Supplementary Table S3. Correlation matrices showing Spearman rank correlation coefficient between parameters recorded during July 2019 in three rainbow trout farms from Romania. Significant correlations were marked with a box in the table. Significance codes are the following: P<0.0001 ‘\*\*\*’ P<0.001 ‘\*\*’ P<0.01 ‘\*’ P<0.05 ‘.’ (Abbreviations: Hb – hemoglobin, Hct – hematocrit, RBC – red blood cell count, MCV – mean corpuscular volume, MCH – mean corpuscular hemoglobin, MCHC - mean corpuscular hemoglobin concentration, T – testosterone, E<sub>2</sub> – estradiol, PROG – progesterone, F – cortisol, SOD – superoxide dismutase, GPx - glutathione peroxidase, Temp – temperature, Cond – Conductivity, TDS – total dissolved solids, DO – dissolved oxygen, NO<sub>2</sub> – nitrites, NO<sub>3</sub> – nitrates, NH<sub>3</sub> – ammonia, bdy – body temperature)

| July 2019       | Hb    | Hct      | RBC      | MCV   | MCH     | MCHC  | T       | E <sub>2</sub> | PROG  | F        | SOD   | GPx    | pH    | Temp  | Resist | Cond  | TDS   | Salinity | DO    | NO <sub>2</sub> | NO <sub>3</sub> | NH <sub>3</sub> | bdy   |
|-----------------|-------|----------|----------|-------|---------|-------|---------|----------------|-------|----------|-------|--------|-------|-------|--------|-------|-------|----------|-------|-----------------|-----------------|-----------------|-------|
| Hb              | 1     | 0.41*    | 0.31.    | 0.24  | 0.57*** | 0.18  | 0.34.   | -0.16          | 0.29  | 0.49**   | 0.18  | -0.3.  | 0.36  | -0.27 | -0.08  | 0.36  | 0.36  | -0.11    | 0.36  | -0.36           | -0.36           | -0.27           | -0.24 |
| Hct             | 0.41  | 1        | 0.69***  | 0.56  | -0.14   | -0.72 | 0.57*** | -0.31.         | 0.29  | 0.72***  | 0.14  | -0.23  | 0.9   | -0.42 | -0.48  | 0.9   | 0.9   | 0.04     | 0.9   | -0.9            | -0.9            | -0.42           | -0.38 |
| RBC             | 0.31  | 0.69***  | 1        | -0.15 | -0.52** | -0.53 | 0.32.   | -0.21          | 0.27  | 0.56***  | -0.17 | -0.17  | 0.65  | -0.28 | -0.37  | 0.65  | 0.65  | 0.05     | 0.65  | -0.65           | -0.65           | -0.28           | -0.25 |
| MCV             | 0.24  | 0.56***  | -0.15    | 1     | 0.45*   | -0.35 | 0.36.   | -0.16          | 0.15  | 0.37.    | 0.36  | -0.12  | 0.49  | -0.22 | -0.27  | 0.49  | 0.49  | 0.03     | 0.49  | -0.49           | -0.49           | -0.22           | -0.21 |
| MCH             | 0.57  | -0.14    | -0.52**  | 0.45  | 1       | 0.56  | -0.07   | 0.04           | -0.02 | -0.01    | 0.33  | -0.04  | -0.14 | 0.07  | 0.07   | -0.14 | -0.14 | 0        | -0.14 | 0.14            | 0.14            | 0.07            | 0.04  |
| MCHC            | 0.18  | -0.72*** | -0.53**  | -0.35 | 0.56*** | 1     | -0.46*  | 0.26           | -0.21 | -0.42*   | 0.07  | 0.05   | -0.65 | 0.38  | 0.27   | -0.65 | -0.65 | 0.07     | -0.65 | 0.65            | 0.65            | 0.38            | 0.3   |
| T               | 0.34  | 0.57***  | 0.32.    | 0.36  | -0.07   | -0.46 | 1       | -0.31.         | 0.37  | 0.58***  | -0.01 | -0.32. | 0.6   | -0.47 | -0.13  | 0.6   | 0.6   | -0.2     | 0.6   | -0.6            | -0.6            | -0.47           | -0.36 |
| E <sub>2</sub>  | -0.16 | -0.31.   | -0.21    | -0.16 | 0.04    | 0.26  | -0.31.  | 1              | -0.22 | -0.41*   | -0.04 | 0.07   | -0.4  | 0.26  | 0.14   | -0.4  | -0.4  | 0.07     | -0.4  | 0.4             | 0.4             | 0.26            | 0.1   |
| PROG            | 0.29  | 0.29     | 0.27     | 0.15  | -0.02   | -0.21 | 0.37.   | -0.22          | 1     | 0.39*    | -0.13 | -0.16  | 0.32  | -0.63 | 0.32   | 0.32  | 0.32  | -0.55    | 0.32  | -0.32           | -0.32           | -0.63           | -0.65 |
| F               | 0.49  | 0.72***  | 0.56***  | 0.37  | -0.01   | -0.42 | 0.58*** | -0.41*         | 0.39  | 1        | 0.02  | -0.29  | 0.83  | -0.58 | -0.25  | 0.83  | 0.83  | -0.19    | 0.83  | -0.83           | -0.83           | -0.58           | -0.51 |
| SOD             | 0.18  | 0.14     | -0.17    | 0.36  | 0.33.   | 0.07  | -0.01   | -0.04          | -0.13 | 0.02     | 1     | -0.01  | 0.09  | -0.02 | -0.07  | 0.09  | 0.09  | 0.03     | 0.09  | -0.09           | -0.09           | -0.02           | -0.02 |
| GPx             | -0.3  | -0.23    | -0.17    | -0.12 | -0.04   | 0.05  | -0.32.  | 0.07           | -0.16 | -0.29    | -0.01 | 1      | -0.19 | 0.48  | -0.29  | -0.19 | -0.19 | 0.45     | -0.19 | 0.19            | 0.19            | 0.48            | 0.44  |
| pH              | 0.36  | 0.9***   | 0.65***  | 0.49  | -0.14   | -0.65 | 0.6***  | -0.4*          | 0.32  | 0.83***  | 0.09  | -0.19  | 1     | -0.5  | -0.5   | 1     | 1     | 0        | 1     | -1              | -1              | -0.5            | -0.42 |
| Temp            | -0.27 | -0.42*   | -0.28    | -0.22 | 0.07    | 0.38  | -0.47*  | 0.26           | -0.63 | -0.58*** | -0.02 | 0.48** | -0.5  | 1     | -0.5   | -0.5  | -0.5  | 0.87     | -0.5  | 0.5             | 0.5             | 1               | 0.9   |
| Resist          | -0.08 | -0.48**  | -0.37.   | -0.27 | 0.07    | 0.27  | -0.13   | 0.14           | 0.32  | -0.25    | -0.07 | -0.29  | -0.5  | -0.5  | 1      | -0.5  | -0.5  | -0.87    | -0.5  | 0.5             | 0.5             | -0.5            | -0.48 |
| Cond            | 0.36  | 0.9***   | 0.65***  | 0.49  | -0.14   | -0.65 | 0.6***  | -0.4*          | 0.32  | 0.83***  | 0.09  | -0.19  | 1     | -0.5  | -0.5   | 1     | 1     | 0        | 1     | -1              | -1              | -0.5            | -0.42 |
| TDS             | 0.36  | 0.9***   | 0.65***  | 0.49  | -0.14   | -0.65 | 0.6***  | -0.4*          | 0.32  | 0.83***  | 0.09  | -0.19  | 1     | -0.5  | -0.5   | 1     | 1     | 0        | 1     | -1              | -1              | -0.5            | -0.42 |
| Salinity        | -0.11 | 0.04     | 0.05     | 0.03  | 0       | 0.07  | -0.2    | 0.07           | -0.55 | -0.19    | 0.03  | 0.45*  | 0     | 0.87  | -0.87  | 0     | 0     | 1        | 0     | 0               | 0               | 0.87            | 0.8   |
| DO              | 0.36  | 0.9***   | 0.65***  | 0.49  | -0.14   | -0.65 | 0.6***  | -0.4*          | 0.32  | 0.83***  | 0.09  | -0.19  | 1     | -0.5  | -0.5   | 1     | 1     | 0        | 1     | -1              | -1              | -0.5            | -0.42 |
| NO <sub>2</sub> | -0.36 | -0.9***  | -0.65*** | -0.49 | 0.14    | 0.65  | -0.6*** | 0.4*           | -0.32 | -0.83*** | -0.09 | 0.19   | -1    | 0.5   | 0.5    | -1    | -1    | 0        | -1    | 1               | 1               | 0.5             | 0.42  |
| NO <sub>3</sub> | -0.36 | -0.9***  | -0.65*** | -0.49 | 0.14    | 0.65  | -0.6*** | 0.4*           | -0.32 | -0.83*** | -0.09 | 0.19   | -1    | 0.5   | 0.5    | -1    | -1    | 0        | -1    | 1               | 1               | 0.5             | 0.42  |
| NH <sub>3</sub> | -0.27 | -0.42*   | -0.28    | -0.22 | 0.07    | 0.38  | -0.47*  | 0.26           | -0.63 | -0.58*** | -0.02 | 0.48** | -0.5  | 1     | -0.5   | -0.5  | -0.5  | 0.87     | -0.5  | 0.5             | 0.5             | 1               | 0.9   |
| bdy-temp        | -0.24 | -0.38.   | -0.25    | -0.21 | 0.04    | 0.3   | -0.36.  | 0.1            | -0.65 | -0.51**  | -0.02 | 0.44*  | -0.42 | 0.9   | -0.48  | -0.42 | -0.42 | 0.8      | -0.42 | 0.42            | 0.42            | 0.9             | 1     |

Supplementary Table S4. Correlation matrices showing Spearman rank correlation coefficient between parameters recorded during August 2019 in three rainbow trout farms from Romania. Significant correlations were marked with a box in the table. Significance codes are the following: P<0.0001 ‘\*\*\*’ P<0.001 ‘\*\*’ P<0.01 ‘\*’ P<0.05 ‘.’ (Abbreviations: Hb – hemoglobin, Hct – hematocrit, RBC – red blood cell count, MCV – mean corpuscular volume, MCH – mean corpuscular hemoglobin, MCHC – mean corpuscular hemoglobin concentration, T – testosterone, E<sub>2</sub> – estradiol, PROG – progesterone, F – cortisol, SOD – superoxide dismutase, GPx – glutathione peroxidase, Temp – temperature, Cond – Conductivity, TDS – total dissolved solids, DO – dissolved oxygen, NO<sub>2</sub> – nitrites, NO<sub>3</sub> – nitrates, NH<sub>3</sub> – ammonia, bdy – body temperature)

| August 2019     | Hb    | Hct      | RBC      | MCV   | MCH      | MCHC  | T     | E <sub>2</sub> | PROG  | F     | SOD   | GPx      | pH    | Temp  | Resist | Cond  | TDS   | Salinity | DO    | NO <sub>2</sub> | NO <sub>3</sub> | NH <sub>3</sub> | bdy   |
|-----------------|-------|----------|----------|-------|----------|-------|-------|----------------|-------|-------|-------|----------|-------|-------|--------|-------|-------|----------|-------|-----------------|-----------------|-----------------|-------|
| Hb              | 1     | 0.18     | 0.25     | -0.07 | 0.51**   | 0.61  | 0.41* | 0.16           | 0.26  | 0.02  | 0.08  | -0.31.   | 0.39  | 0.3   | -0.69  | 0.69  | 0.69  | 0.69     | -0.3  | -0.39           | 0.3             | -0.39           | 0.15  |
| Hct             | 0.18  | 1        | 0.2      | 0.52  | -0.08    | -0.64 | 0.01  | 0.17           | 0.05  | -0.23 | 0     | -0.09    | 0.28  | -0.29 | 0.01   | -0.01 | -0.01 | -0.01    | 0.29  | -0.28           | -0.3            | -0.29           | -0.26 |
| RBC             | 0.25  | 0.2      | 1        | -0.7  | -0.65*** | 0.02  | 0.3.  | 0.47*          | 0.14  | -0.12 | 0.13  | -0.13    | 0.48  | -0.31 | -0.17  | 0.17  | 0.17  | 0.17     | 0.31  | -0.48           | -0.3            | -0.47           | -0.28 |
| MCV             | -0.07 | 0.52**   | -0.7***  | 1     | 0.49**   | -0.46 | -0.25 | -0.25          | -0.03 | -0.05 | -0.04 | 0.04     | -0.16 | -0.01 | 0.17   | -0.17 | -0.17 | -0.17    | 0.01  | 0.16            | -0.02           | 0.14            | -0.01 |
| MCH             | 0.51  | -0.08    | -0.65*** | 0.49  | 1        | 0.5   | 0.03  | -0.34          | 0.05  | 0.07  | -0.12 | -0.1     | -0.18 | 0.59  | -0.41  | 0.41  | 0.41  | 0.41     | -0.59 | 0.18            | 0.58            | 0.17            | 0.47  |
| MCHC            | 0.61  | -0.64*** | 0.02     | -0.46 | 0.5**    | 1     | 0.28  | -0.06          | 0.14  | 0.17  | 0.03  | -0.17    | 0.05  | 0.51  | -0.56  | 0.56  | 0.56  | 0.56     | -0.51 | -0.05           | 0.52            | -0.03           | 0.38  |
| T               | 0.41  | 0.01     | 0.3.     | -0.25 | 0.03     | 0.28  | 1     | 0.33.          | -0.09 | 0.01  | 0.05  | 0.07     | 0.14  | 0.12  | -0.25  | 0.25  | 0.25  | 0.25     | -0.12 | -0.14           | 0.12            | -0.13           | -0.03 |
| E <sub>2</sub>  | 0.16  | 0.17     | 0.47*    | -0.25 | -0.34.   | -0.06 | 0.33. | 1              | -0.06 | 0.13  | 0.11  | 0.14     | 0.23  | -0.39 | 0.16   | -0.16 | -0.16 | -0.16    | 0.39  | -0.23           | -0.39           | -0.23           | -0.34 |
| PROG            | 0.26  | 0.05     | 0.14     | -0.03 | 0.05     | 0.14  | -0.09 | -0.06          | 1     | 0.07  | 0.14  | -0.29    | 0.32  | -0.13 | -0.19  | 0.19  | 0.19  | 0.19     | 0.13  | -0.32           | -0.13           | -0.32           | -0.08 |
| F               | 0.02  | -0.23    | -0.12    | -0.05 | 0.07     | 0.17  | 0.01  | 0.13           | 0.07  | 1     | -0.01 | -0.04    | -0.17 | 0.08  | 0.08   | -0.08 | -0.08 | -0.08    | -0.08 | 0.17            | 0.07            | 0.15            | 0.2   |
| SOD             | 0.08  | 0        | 0.13     | -0.04 | -0.12    | 0.03  | 0.05  | 0.11           | 0.14  | -0.01 | 1     | 0.24     | 0.33  | -0.31 | -0.03  | 0.03  | 0.03  | 0.03     | 0.31  | -0.33           | -0.3            | -0.33           | -0.42 |
| GPx             | -0.31 | -0.09    | -0.13    | 0.04  | -0.1     | -0.17 | 0.07  | 0.14           | -0.29 | -0.04 | 0.24  | 1        | -0.59 | -0.03 | 0.62   | -0.62 | -0.62 | -0.62    | 0.03  | 0.59            | -0.03           | 0.59            | -0.09 |
| pH              | 0.39  | 0.28     | 0.48**   | -0.16 | -0.18    | 0.05  | 0.14  | 0.23           | 0.32  | -0.17 | 0.33  | -0.59*** | 1     | -0.5  | -0.5   | 0.5   | 0.5   | 0.5      | 0.5   | -1              | -0.5            | -1              | -0.55 |
| Temp            | 0.3   | -0.29    | -0.31.   | -0.01 | 0.59***  | 0.51  | 0.12  | -0.39*         | -0.13 | 0.08  | -0.31 | -0.03    | -0.5  | 1     | -0.5   | 0.5   | 0.5   | 0.5      | -1    | 0.5             | 1               | 0.5             | 0.87  |
| Resist          | -0.69 | 0.01     | -0.17    | 0.17  | -0.41*   | -0.56 | -0.25 | 0.16           | -0.19 | 0.08  | -0.03 | 0.62***  | -0.5  | -0.5  | 1      | -1    | -1    | -1       | 0.5   | 0.5             | -0.5            | 0.5             | -0.32 |
| Cond            | 0.69  | -0.01    | 0.17     | -0.17 | 0.41*    | 0.56  | 0.25  | -0.16          | 0.19  | -0.08 | 0.03  | -0.62*** | 0.5   | 0.5   | -1     | 1     | 1     | 1        | -0.5  | -0.5            | 0.5             | -0.5            | 0.32  |
| TDS             | 0.69  | -0.01    | 0.17     | -0.17 | 0.41*    | 0.56  | 0.25  | -0.16          | 0.19  | -0.08 | 0.03  | -0.62*** | 0.5   | 0.5   | -1     | 1     | 1     | 1        | -0.5  | -0.5            | 0.5             | -0.5            | 0.32  |
| Salinity        | 0.69  | -0.01    | 0.17     | -0.17 | 0.41*    | 0.56  | 0.25  | -0.16          | 0.19  | -0.08 | 0.03  | -0.62*** | 0.5   | 0.5   | -1     | 1     | 1     | 1        | -0.5  | -0.5            | 0.5             | -0.5            | 0.32  |
| DO              | -0.3  | 0.29     | 0.31.    | 0.01  | -0.59*** | -0.51 | -0.12 | 0.39*          | 0.13  | -0.08 | 0.31  | 0.03     | 0.5   | -1    | 0.5    | -0.5  | -0.5  | -0.5     | 1     | -0.5            | -1              | -0.5            | -0.87 |
| NO <sub>2</sub> | -0.39 | -0.28    | -0.48**  | 0.16  | 0.18     | -0.05 | -0.14 | -0.23          | -0.32 | 0.17  | -0.33 | 0.59***  | -1    | 0.5   | 0.5    | -0.5  | -0.5  | -0.5     | -0.5  | 1               | 0.5             | 1               | 0.55  |
| NO <sub>3</sub> | 0.3   | -0.3.    | -0.3.    | -0.02 | 0.58***  | 0.52  | 0.12  | -0.39*         | -0.13 | 0.07  | -0.3  | -0.03    | -0.5  | 1     | -0.5   | 0.5   | 0.5   | 0.5      | -1    | 0.5             | 1               | 0.5             | 0.86  |
| NH <sub>3</sub> | -0.39 | -0.29    | -0.47*   | 0.14  | 0.17     | -0.03 | -0.13 | -0.23          | -0.32 | 0.15  | -0.33 | 0.59***  | -1    | 0.5   | 0.5    | -0.5  | -0.5  | -0.5     | -0.5  | 1               | 0.5             | 1               | 0.55  |
| bdy-temp        | 0.15  | -0.26    | -0.28    | -0.01 | 0.47*    | 0.38  | -0.03 | -0.34.         | -0.08 | 0.2   | -0.42 | -0.09    | -0.55 | 0.87  | -0.32  | 0.32  | 0.32  | 0.32     | -0.87 | 0.55            | 0.86            | 0.55            | 1     |
